# Supplementary material for: Control of Directed Cell Migration In Vivo by Membrane-to-Cortex Attachment
Source: PubMed Central journal article supplement (PMC2994655; doi:10.1371/journal.pbio.1000544), 2010-11-30
Supplement: pbio.1000544.s007.pdf [file pbio.1000544.s007.pdf]

**A**

| cell type             | $1 \mu\text{m} \cdot \text{s}^{-1}$ |                              | $5 \mu\text{m} \cdot \text{s}^{-1}$ |                              | $10 \mu\text{m} \cdot \text{s}^{-1}$ |                              |
|-----------------------|-------------------------------------|------------------------------|-------------------------------------|------------------------------|--------------------------------------|------------------------------|
|                       | mean                                | $N_{\text{tethers}}$ (cells) | mean                                | $N_{\text{tethers}}$ (cells) | mean                                 | $N_{\text{tethers}}$ (cells) |
| Control               | 41.5pN                              | 94(42)                       | 51.2pN                              | 101(40)                      | 56.7pN                               | 137(38)                      |
| +DNEzrin              | 22pN                                | 38(22)                       | 28.8pN                              | 50(26)                       | 30.3pN                               | 70(30)                       |
| +ezrin2, radixin MO   | 29.1pN                              | 77(37)                       | 32.8pN                              | 112(37)                      | 39pN                                 | 130(37)                      |
| +Latrunculin A (LatA) | 14.6pN                              | 58(28)                       | 20.5pN                              | 72(29)                       | 19pN                                 | 81(34)                       |
| +DNEzrin+LatA         | 12pN                                | 28(13)                       | 16.6pN                              | 29(15)                       | 19.3pN                               | 31(15)                       |

  

| cell type           | $20 \mu\text{m} \cdot \text{s}^{-1}$ |                              | $35 \mu\text{m} \cdot \text{s}^{-1}$ |                              | $50 \mu\text{m} \cdot \text{s}^{-1}$ |                              |
|---------------------|--------------------------------------|------------------------------|--------------------------------------|------------------------------|--------------------------------------|------------------------------|
|                     | mean                                 | $N_{\text{tethers}}$ (cells) | mean                                 | $N_{\text{tethers}}$ (cells) | mean                                 | $N_{\text{tethers}}$ (cells) |
| Control             | 67pN                                 | 116(39)                      | 76pN                                 | 26(13)                       | 79pN                                 | 68(29)                       |
| +DNEzrin            | 33pN                                 | 50(26)                       | 39.6pN                               | 14(6)                        | 44pN                                 | 66(27)                       |
| +ezrin2, radixin MO | 42pN                                 | 142(40)                      | 47pN                                 | 40(16)                       | 48.5pN                               | 55(20)                       |
| +LatA               | 22.9pN                               | 71(24)                       | 21.4pN                               | 24(12)                       | 23.7pN                               | 47(20)                       |
| +DNEzrin+LatA       | 23pN                                 | 28(12)                       | 28pN                                 | 21(10)                       | 32.5pN                               | 15(10)                       |

**B**

| cell type           | $F_0^{\text{Median}}$ | $N_{\text{tethers}}$ (cells) | $F_0^{\text{fit}}$ |
|---------------------|-----------------------|------------------------------|--------------------|
| Control             | 32pN                  | 114(56)                      | <b>32.3pN</b>      |
| +DNEzrin            | 19.1pN                | 48(24)                       | <b>19.1pN</b>      |
| +ezrin2, radixin MO | 17pN                  | 76(45)                       | <b>25pN</b>        |
| +LatA               | 9.9pN                 | 9(5)                         | <b>15.1pN</b>      |
| +myo1b MO           | 24pN                  | 49(31)                       | -                  |
| +myoPhosphatase MO  | 41.8pN                | 45(22)                       | -                  |
